# Supplementary material
Source: Springer Nature journal article supplement (https://www.springermedizin.de/resource/supplementary/12936_2009_891_MOESM10_ESM.pdf/9548478)
Supplement: MOESM10 [file 9548478]

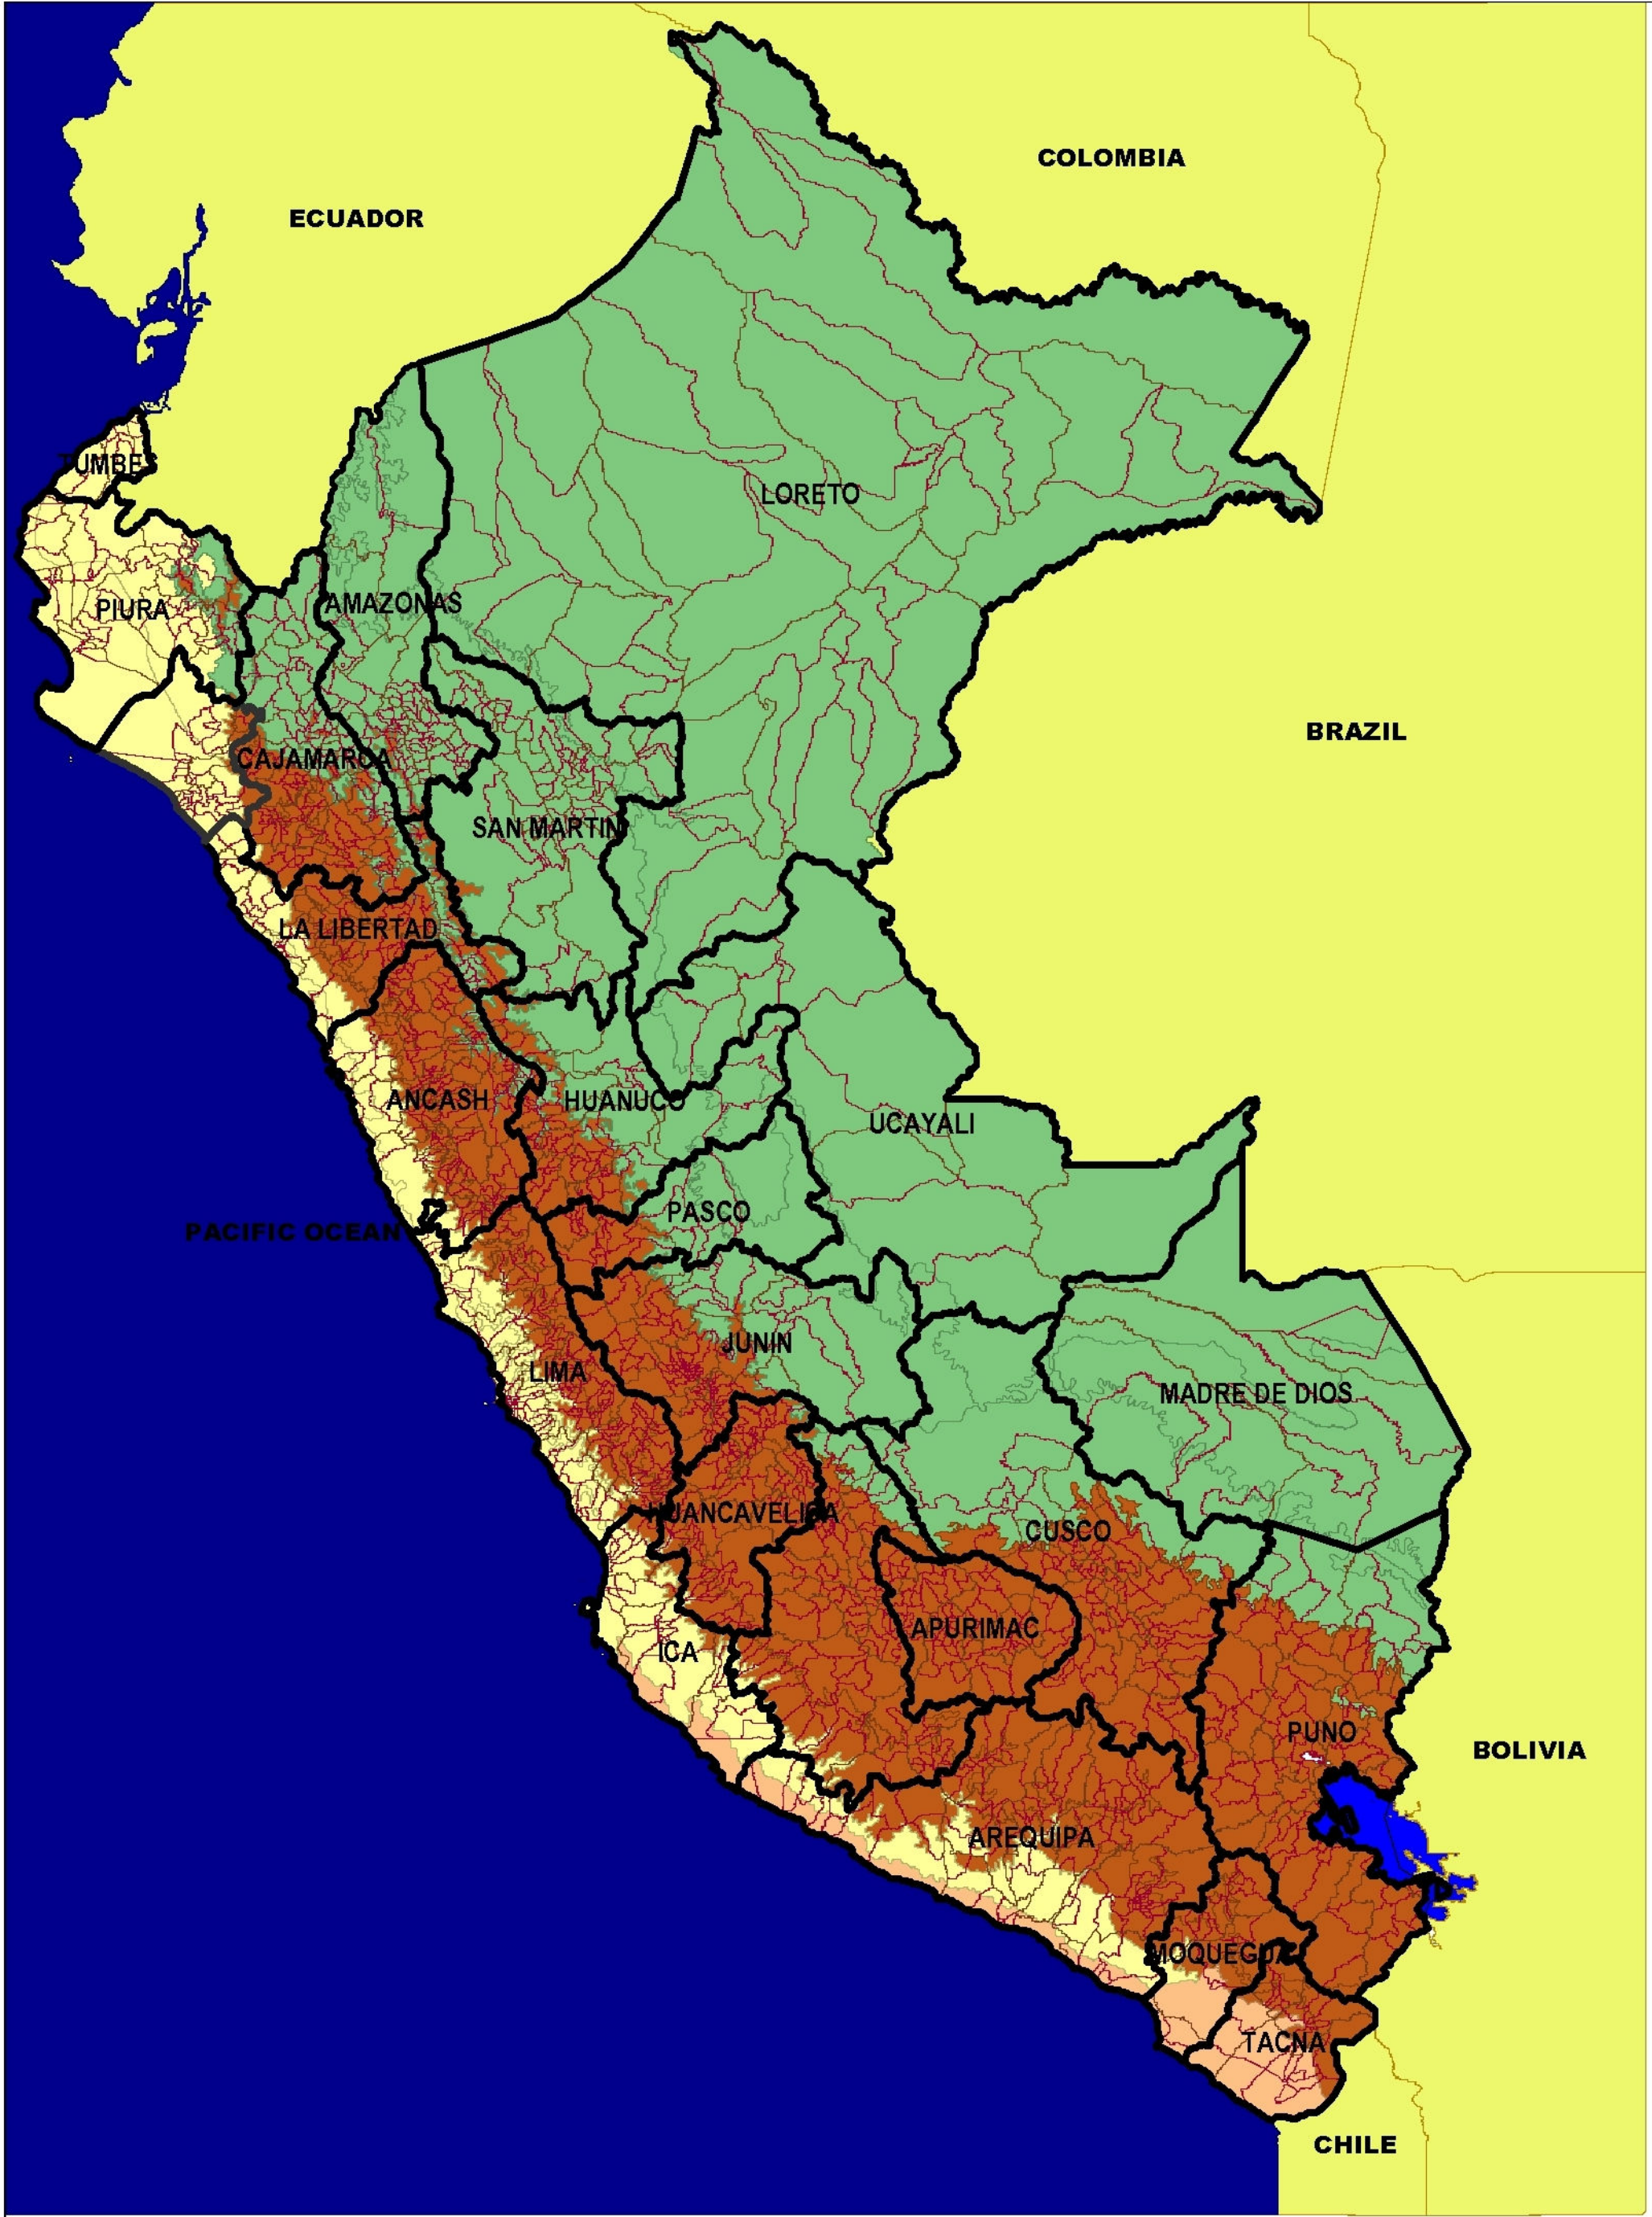

ECUADOR

COLOMBIA

TUMBE

LORETO

PIURA

AMAZONAS

BRAZIL

CAJAMARCA

SAN MARTIN

LA LIBERTAD

ANCASH

HUANUCO

UCAYALI

PACIFIC OCEAN

PASCO

JUNIN

MADRE DE DIOS

LIMA

CUSCO

HUANCAVELICA

APURIMAC

ICA

BOLIVIA

PUNO

AREQUIPA

MOQUEGUA

TACNA

CHILE
